# Supplementary material
Source: HighWire-hosted journal article supplement (https://www.cmajopen.ca/highwire/filestream/84472/field_highwire_adjunct_files/2/2020-0071-3-at.pdf)
Supplement: 2020-0071-3-at.pdf [file 2020-0071-3-at.pdf]

Appendix 3 (as supplied by the authors): Prescriber Distribution of individual Restricted Medications Prescribed per Hour Worked and Patient Seen

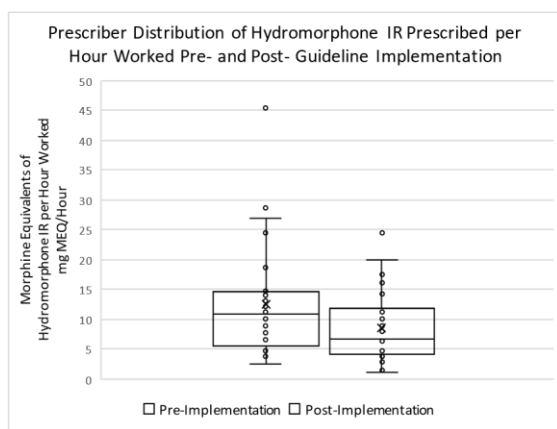

$p = 0.0002$

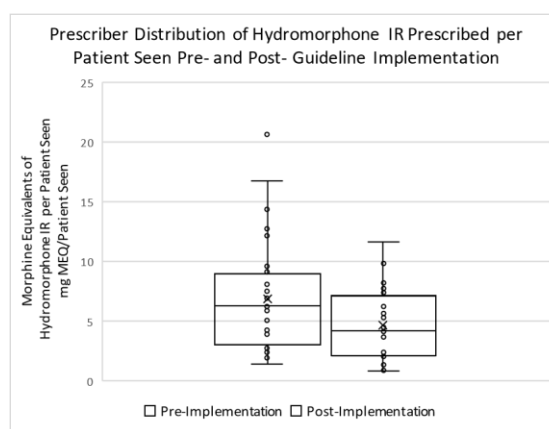

$p = 0.0002$

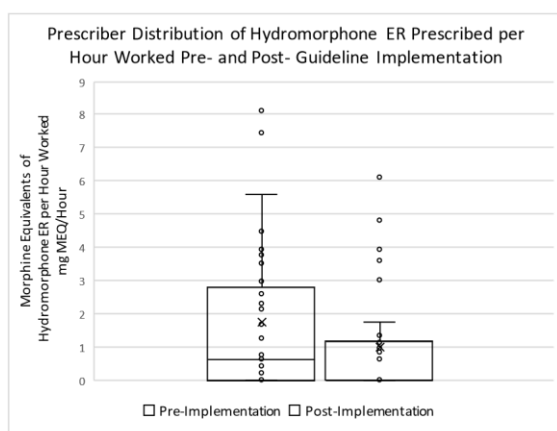

$p = 0.09$

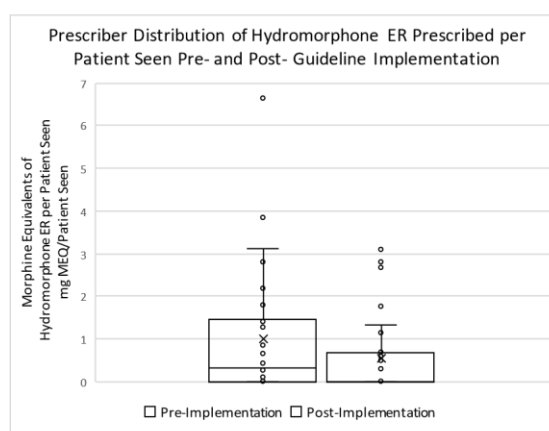

$p = 0.08$

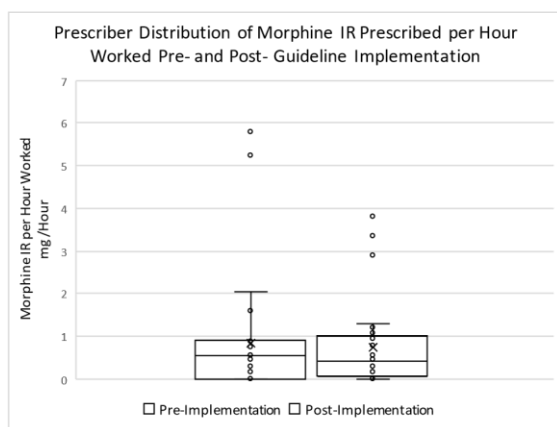

$p = 0.44$

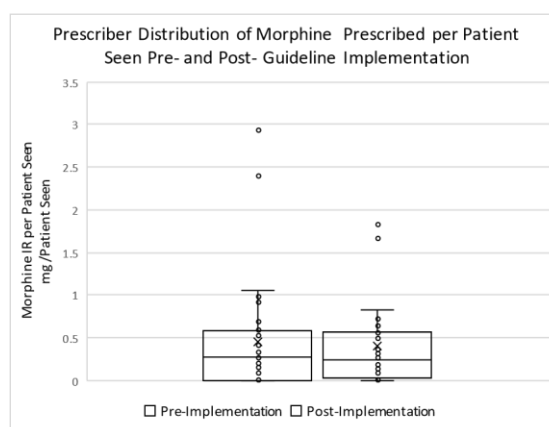

$p = 0.51$

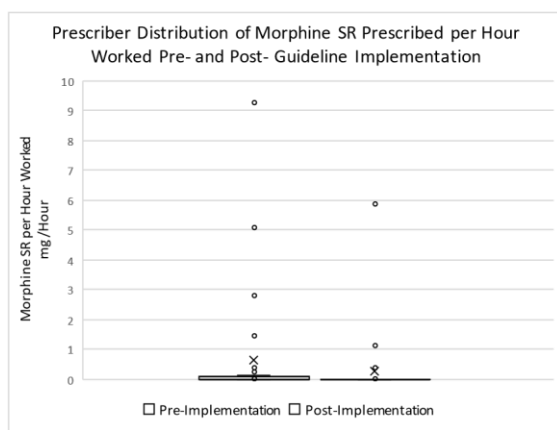

$p = 0.33$

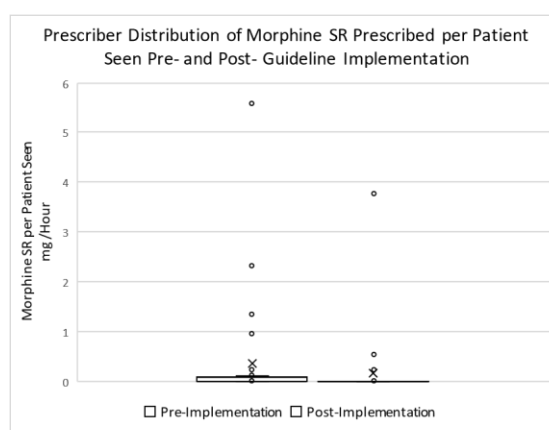

$p = 0.38$

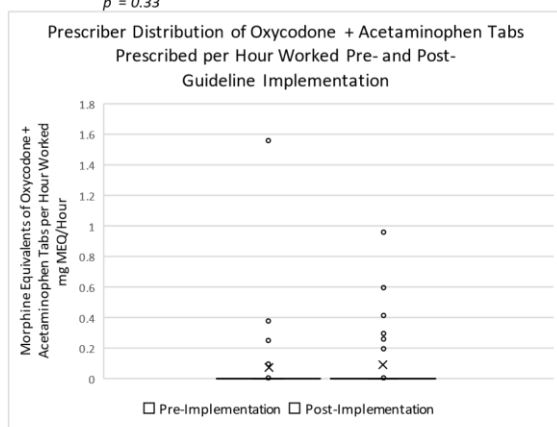

$p = 0.82$

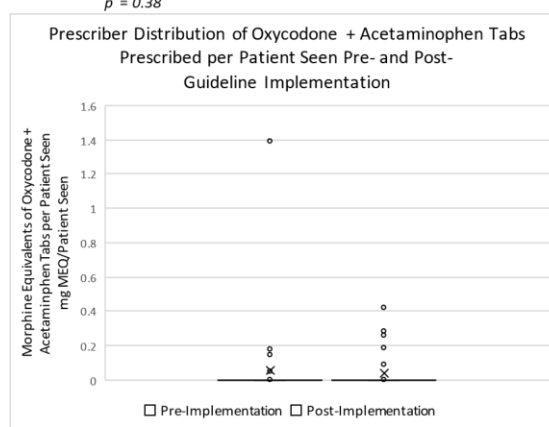

$p = 0.78$

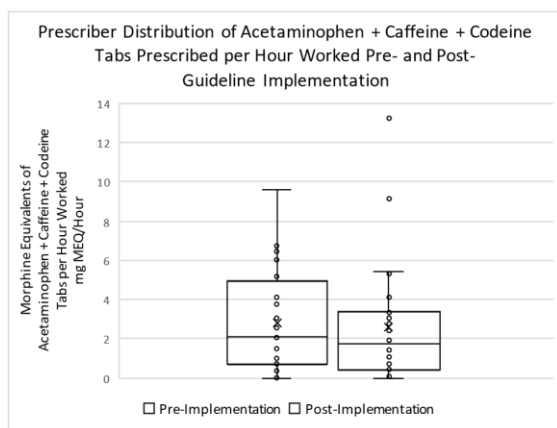

$p = 0.56$

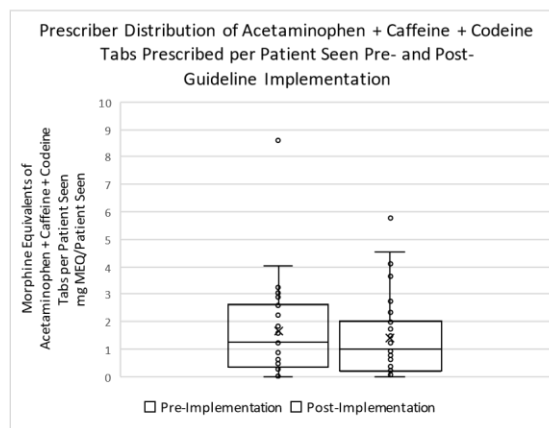

$p = 0.21$
